# Supplementary material for: In-source fragmentation of nucleosides in electrospray ionization towards more sensitive and accurate nucleoside analysis
Source: Royal Society of Chemistry journal article supplement (doi:10.1039/d3an00047h), 2023-01-01
Supplement: d3an00047h1.pdf [file d3an00047h1.pdf]

Supporting Information

**In-source Fragmentation of Nucleosides at  
Electrospray Ionization: Towards More Sensitive  
and Accurate Nucleoside Analysis**

‡Yu-Nan Chen<sup>1</sup>, ‡Xu-Yang Shen<sup>1</sup>, Yue Yu<sup>2</sup>, Chen-Yu Xue<sup>3</sup>, Ying-Lin Zhou<sup>1\*</sup>, Xin-Xiang Zhang<sup>1</sup>

<sup>1</sup> Beijing National Laboratory for Molecular Sciences (BNLMS), MOE Key Laboratory of Bioorganic Chemistry and Molecular Engineering, College of Chemistry and Molecular Engineering, Peking University, Beijing 100871, China.

<sup>2</sup> Institute of Biotechnology Development, Qilu Pharmaceutical, Jinan

<sup>3</sup> Key Laboratory of Forensic Toxicology, Ministry of Public security, Beijing, China

‡ These authors contributed equally to this work.

\* Tel: +86-10-62754112; Fax: +86-10-62754112; Email: zhouyl@pku.edu.cn.

## Contents

|                                                                                                                                                         |      |
|---------------------------------------------------------------------------------------------------------------------------------------------------------|------|
| <b>Table S1.</b> Calculated free energy of unlabeled and labeled nucleosides protonated at different sites.....                                         | S-3  |
| <b>Table S2.</b> Optimization of MS parameters for 5fdC analysis in MRM mode of LC-MS/MS.....                                                           | S-4  |
| <b>Table S3.</b> Profiling of nucleosides in RNA of MCF-7 based on ion pairs resulted from ISF.....                                                     | S-5  |
| <b>Figure S1.</b> Extracted MS spectra of 5fdC, 5fdC-i-Pr <sub>2</sub> N and 5fdC-RBH.....                                                              | S-6  |
| <b>Figure S2.</b> Structures of Labeling reagents for 5fdC.....                                                                                         | S-7  |
| <b>Figure S3.</b> The labeling reaction of 5fdC labeled with different labeling reagents and the fragmentation ratio.....                               | S-8  |
| <b>Figure S4.</b> Structures of different 5fdC species for theoretical calculation.....                                                                 | S-9  |
| <b>Figure S5.</b> 1-H (400M) and 13-C (600M) spectra of 5-formylcytosine labelled by Et <sub>2</sub> N (in CD <sub>3</sub> OD).....                     | S-10 |
| <b>Figure S6.</b> The fragmentation ratio of deoxyribonucleosides under different MS conditions....                                                     | S-11 |
| <b>Figure S7.</b> Optimization of LC-MS conditions for 5fdC-RBH analysis .....                                                                          | S-12 |
| <b>Figure S8.</b> Identification of rC, mrC and rCm based on different original and fragment ions....                                                   | S-13 |
| <b>Figure S9.</b> Determination of nucleosides and modified nucleosides in total RNAs of MCF-7 cells based on different original and fragment ions..... | S-14 |

**Table 1.** Calculated free energy ( $G_f$ ) of unlabeled and labeled nucleosides protonated at different sites<sup>a</sup>

| Species | $G_f(\text{N3}) - G_f(\text{O2})$<br>(kJ/mol) | Species                                 | $G_f - G_f(\text{N1})$<br>(kJ/mol) | Species                 | $G_f - G_f(\text{N})$<br>(kJ/mol) |
|---------|-----------------------------------------------|-----------------------------------------|------------------------------------|-------------------------|-----------------------------------|
| 5cadC   | -18.3785                                      | 5fdC- Et <sub>2</sub> N -N1             | 0                                  | 5fdC-RBH-N <sup>b</sup> | 0                                 |
| 5fdC    | -22.00169                                     | <b>5fdC- Et<sub>2</sub>N -N2</b>        | <b>-65.32244</b>                   | 5fdC-RBH-O <sup>b</sup> | 23.20942                          |
| 5hmdC   | -15.70049                                     | 5fdC- Et <sub>2</sub> N -N3             | -29.45811                          | 5fdC-RBH-N1             | -26.28126                         |
| 5mdC    | -10.39698                                     | 5fdC- Et <sub>2</sub> N -N4             | -27.90907                          | <b>5fdC-RBH-N-N1</b>    | <b>-84.92967</b>                  |
| dC      | -13.75762                                     | 5fdC- Et <sub>2</sub> N -N5             | 44.42346                           |                         |                                   |
| rC      | -15.621725                                    | 5fdC- Et <sub>2</sub> N -N6             | 44.449715                          |                         |                                   |
| mrC     | -12.366105                                    | 5fdC- Et <sub>2</sub> N -O <sup>b</sup> | 8.112795                           |                         |                                   |
| rCm     | -15.411685                                    | 5fdC- Et <sub>2</sub> N -N <sup>b</sup> | -18.82484                          |                         |                                   |

<sup>a</sup> The protonation sites are shown in Figure S4

<sup>b</sup> -O and -N means protonation at O2 or N3 position of the nitrogenous bases

**Table S2.** Optimization of MS parameters for 5fdC analysis in MRM mode of LC-MS/MS

| Analyte                                   | Precursor ion (Q1) | Product ion (Q3) | Collision energy (CE) | Collision cell exit potential (CXP) | LOD (amol) |
|-------------------------------------------|--------------------|------------------|-----------------------|-------------------------------------|------------|
| [5fdC+H] <sup>+</sup>                     | 256.1              | 140.1            | 18                    | 10                                  | 1250       |
| [5fdC-i-Pr <sub>2</sub> N+H] <sup>+</sup> | 547.3              | 431.2            | 31                    | 11                                  | 10         |
| [5fdC-RBH+H] <sup>+</sup>                 | 694.3              | 578.3            | 25                    | 10                                  | 3          |
| [5fdC-RBH+2H] <sup>2+</sup>               | 347.7              | 289.6            | 12                    | 10                                  | 30         |

**Table S3.** Profiling of nucleosides in RNA of MCF-7 cells based on ion pairs resulted from ISF

| Type                | Original ion |             |       | Fragment ion |             |       |
|---------------------|--------------|-------------|-------|--------------|-------------|-------|
|                     | Mass         | Peak height | RT    | Mass         | Peak height | RT    |
| rA                  | 268.104      | 2.02E+09    | 6.81  | 136.061      | 7.46E+07    | 6.77  |
| mrA                 | 282.118      | 8.05E+07    | 10.3  | 150.077      | 2.79E+06    | 10.3  |
| m <sup>6,6</sup> rA | 296.135      | 2.76E+07    | 10.47 | 164.093      | 2.40E+06    | 10.46 |
| rAm                 | 282.118      | 1.84E+08    | 10.09 | 136.061      | 7.63E+06    | 10.09 |
| ct <sup>6</sup> A   | 395.132      | 1.49E+05    | 11.57 | 263.089      | 8.71E+04    | 11.59 |
| rG                  | 284.099      | 8.63E+08    | 5.53  | 152.057      | 2.04E+08    | 5.54  |
| m <sup>1</sup> rG   | 298.115      | 2.30E+06    | 9.21  | 166.072      | 3.00E+05    | 9.21  |
| m <sup>7</sup> rG   | 298.115      | 3.53E+06    | 3.00  | 166.072      | 3.76E+05    | 3.00  |
| rGm                 | 298.115      | 1.12E+07    | 8.29  | 152.057      | 2.55E+06    | 8.29  |
| rC                  | 244.093      | 1.05E+09    | 1.48  | 112.051      | 2.41E+08    | 1.48  |
| m <sup>5</sup> rC   | 258.109      | 5.33E+06    | 2.27  | 126.066      | 1.25E+06    | 2.27  |
| rCm                 | 258.109      | 4.46E+06    | 3.51  | 112.051      | 1.25E+06    | 3.53  |
| ac <sup>4</sup> C   | 286.104      | 1.01E+07    | 5.55  | 154.061      | 5.18E+05    | 5.55  |
| U                   | 245.077      | 1.16E+08    | 2.81  | 113.035      | 6.98E+07    | 2.81  |
| nm <sup>5</sup> U   | 274.103      | 2.93E+05    | 2.68  | 142.061      | 2.98E+04    | 2.66  |
| I                   | 269.088      | 1.22E+05    | 5.35  | 137.046      | 2.76E+05    | 5.35  |

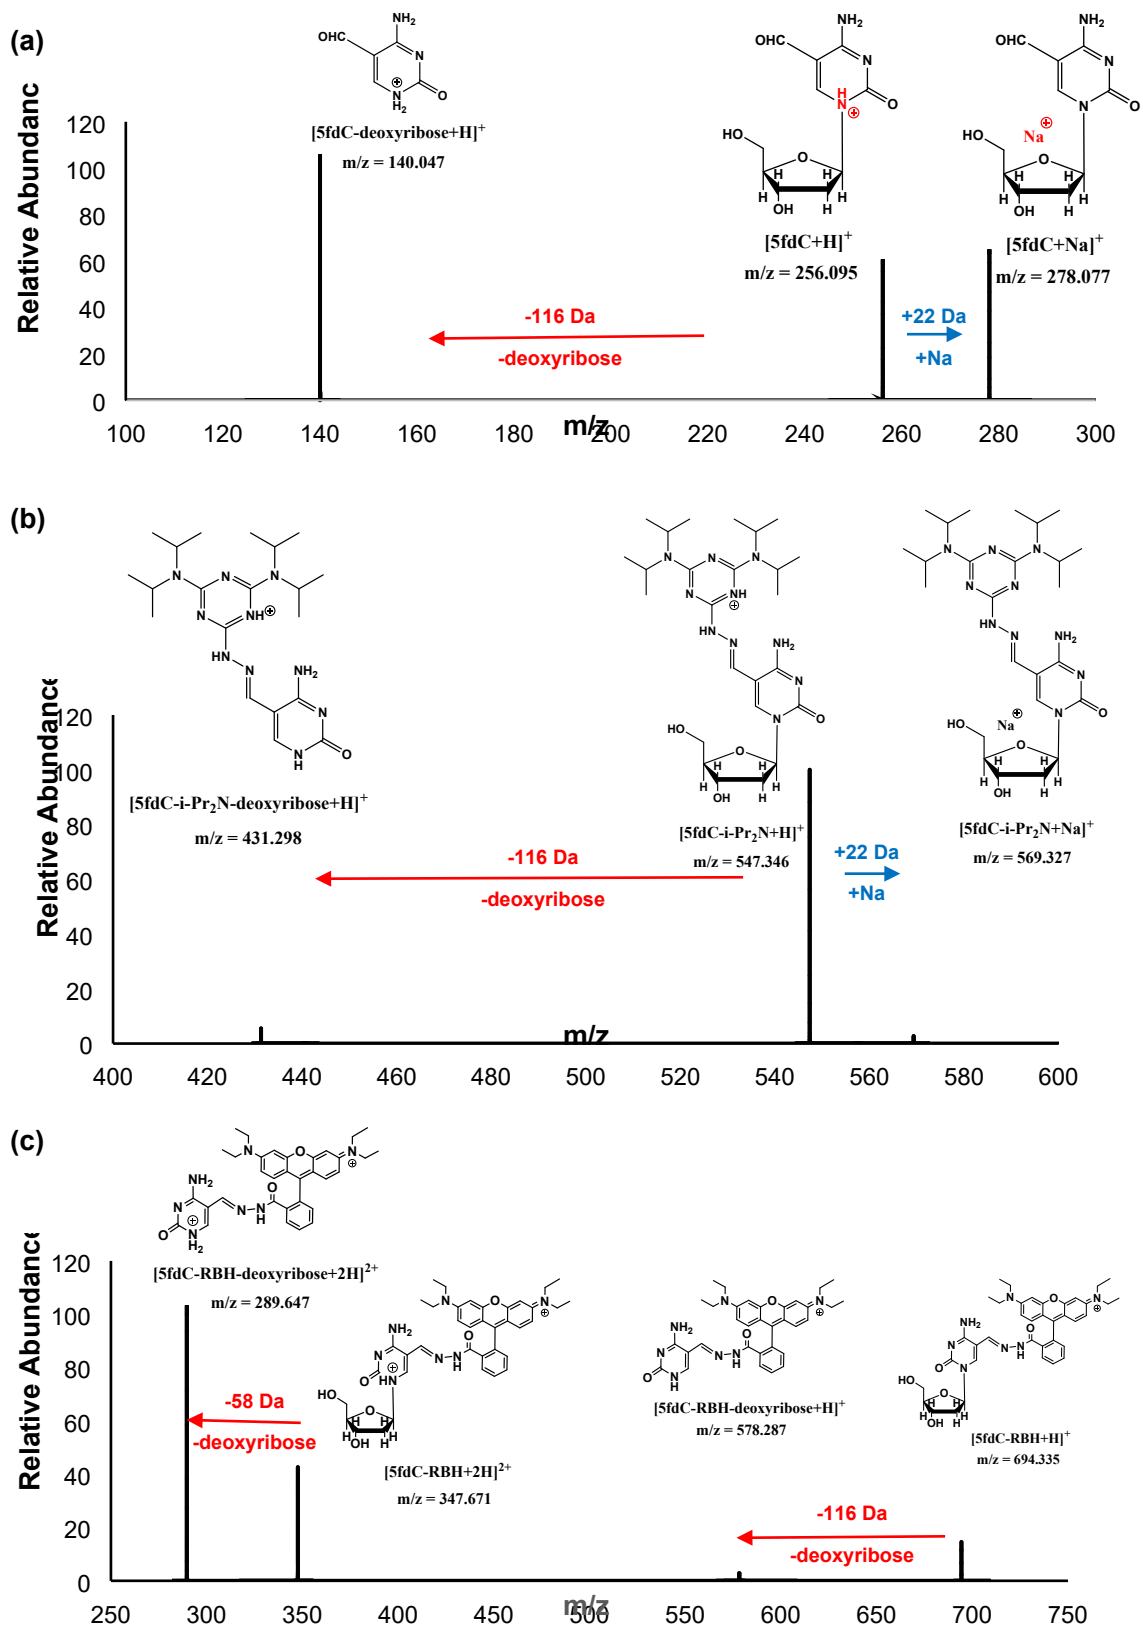

**Figure S1.** Extracted MS spectra of (a) 5fdC, (b) 5fdC-i-Pr<sub>2</sub>N, (c) 5fdC-RBH in LC-MS analysis

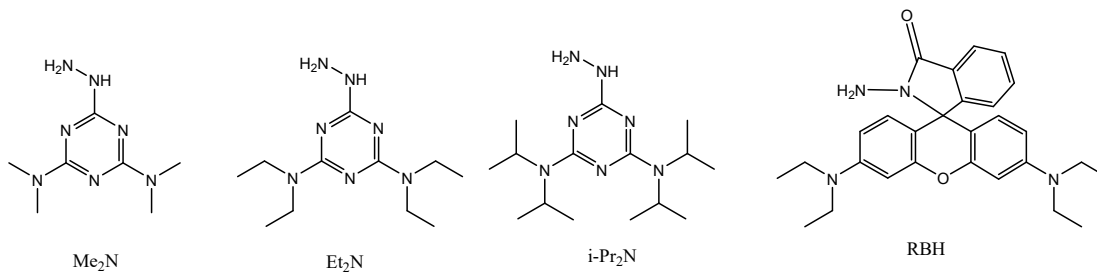

**Figure S2.** Structures of labeling reagents for 5fdC

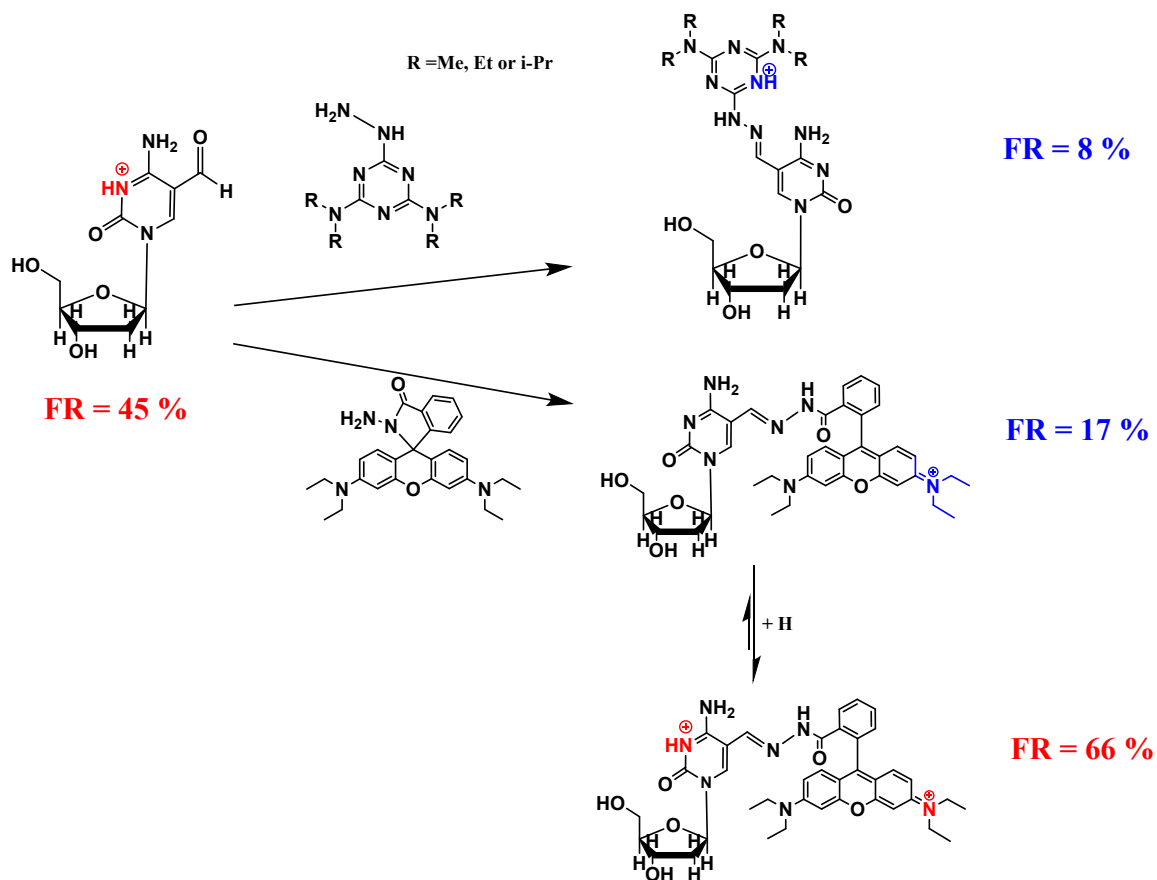

**Figure S3.** The labeling reaction of 5fdC labeled with different labeling reagents and the fragmentation ratio



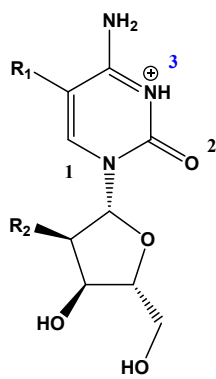

modified C-N3

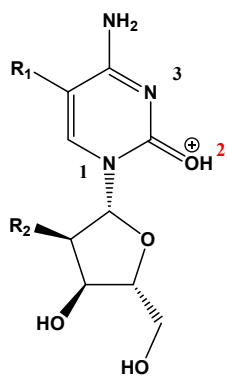

modified C-O2

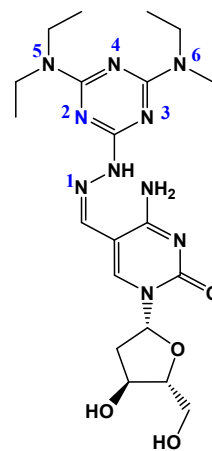

5fdC-Et<sub>2</sub>N-N2

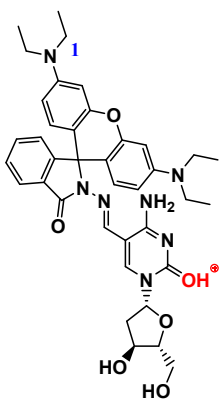

5fdC-RBH-O

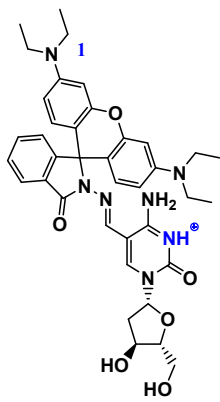

5fdC-RBH-N

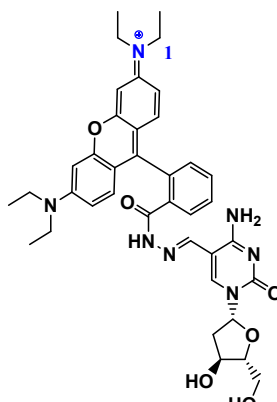

5fdC-RBH-N1

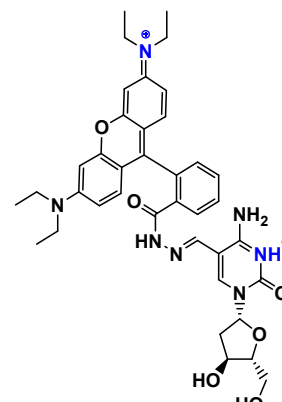

5fdC-RBH-N-N1

Figure S4. Structures of different 5fdC species for theoretical calculation

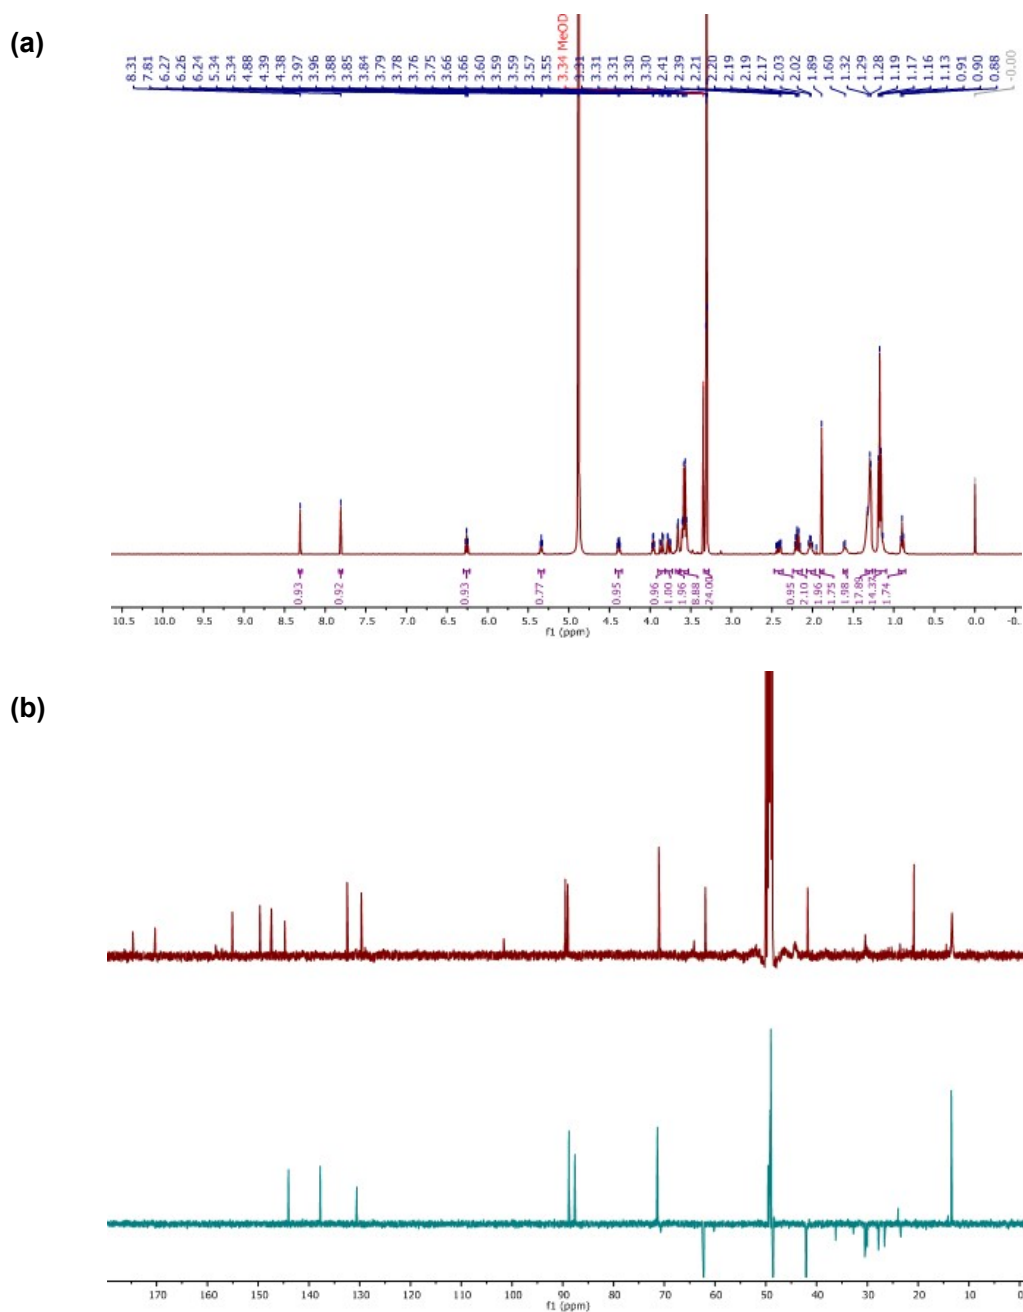

**Figure S5.** (a)  $^1\text{H}$ -NMR (400 M) spectrum of 5fdC- $\text{Et}_2\text{N}$  (in  $\text{CD}_3\text{OD}$ ).  $\delta$  8.31 (s, 1H), 7.81 (s, 1H), 6.26 (t,  $J = 6.3$  Hz, 1H), 5.34 (dd,  $J = 5.4, 4.2$  Hz, 1H), 4.39 (dt,  $J = 6.4, 4.1$  Hz, 1H), 3.86 (dd,  $J = 12.1, 3.1$  Hz, 1H), 3.77 (dd,  $J = 12.2, 3.7$  Hz, 1H), 3.66 (d,  $J = 2.0$  Hz, 2H), 3.58 (q,  $J = 7.0$  Hz, 9H), 3.31 (p,  $J = 1.6$  Hz, 24H), 2.42 (ddd,  $J = 13.7, 6.2, 4.2$  Hz, 1H), 2.24 – 2.13 (m, 2H), 2.02 (dt,  $J = 10.7, 5.7$  Hz, 2H), 1.89 (s, 2H), 1.60 (s, 2H), 1.30 (t,  $J = 7.9$  Hz, 18H), 1.17 (t,  $J = 7.0$  Hz, 14H), 0.94 – 0.86 (m, 2H). (b)  $^{13}\text{C}$ -NMR (600 M) spectra with DEPT of 5fdC- $\text{Et}_2\text{N}$

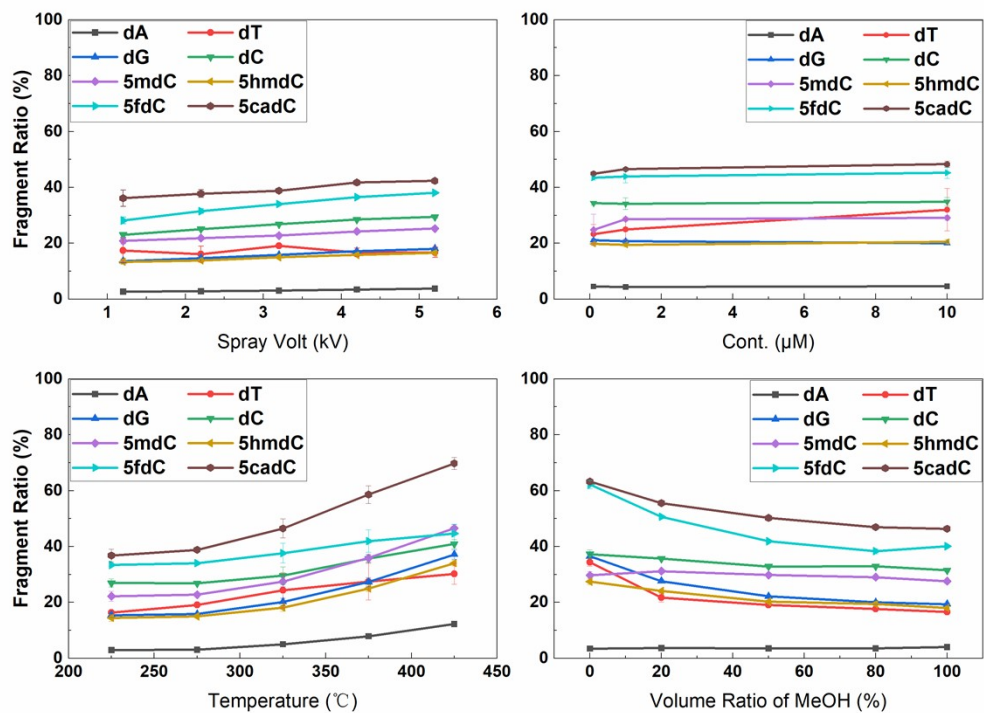

**Figure S6.** The fragmentation ratio of deoxyribonucleosides under (a) different spray voltage, (b) different analyte concentration, (c) different temperature of ion transfer capillary, and (d) different background buffer composition

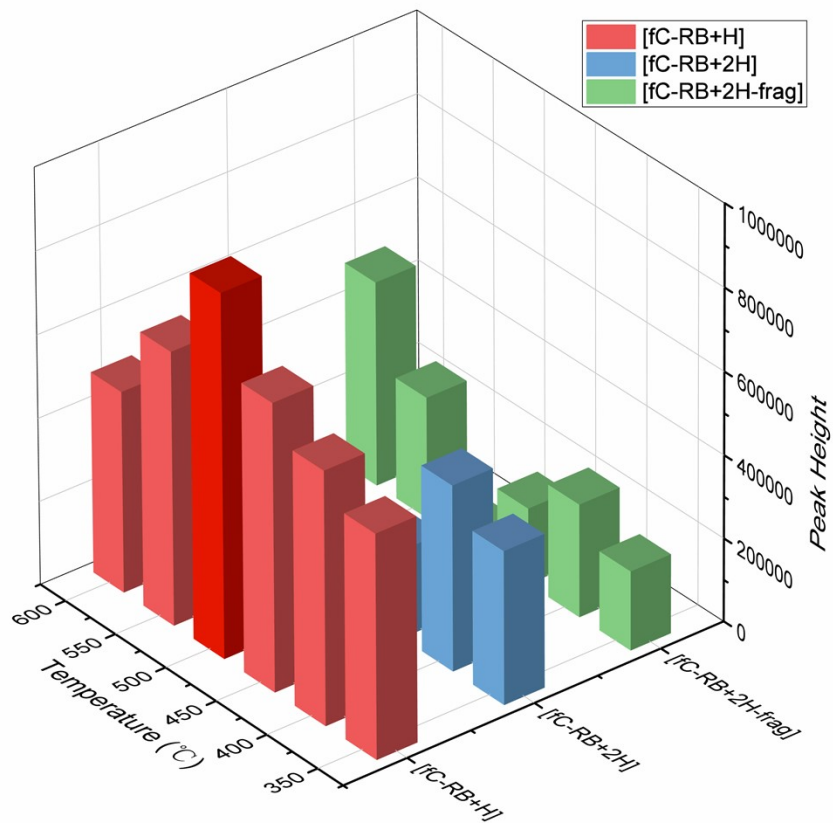

**Figure S7.** Optimization of LC-MS conditions for 5fC-RBH analysis

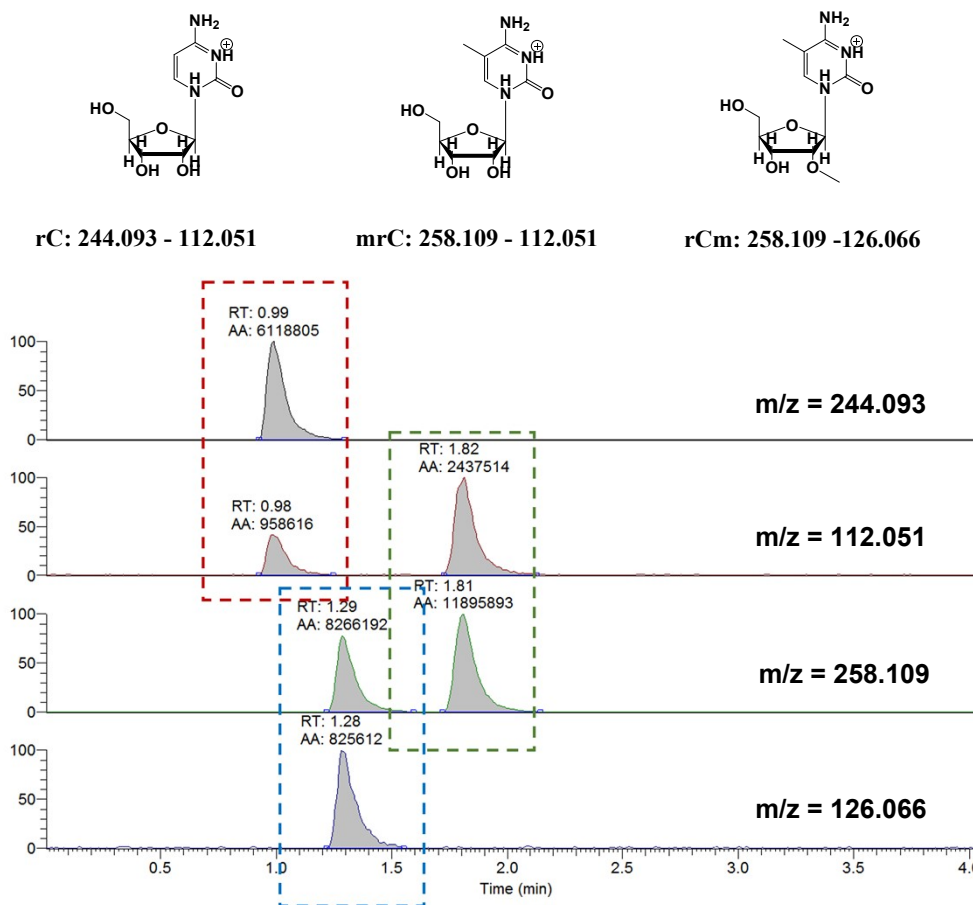

**Figure S8.** Identification of rC, mrC and rCm based on different original and fragment ions

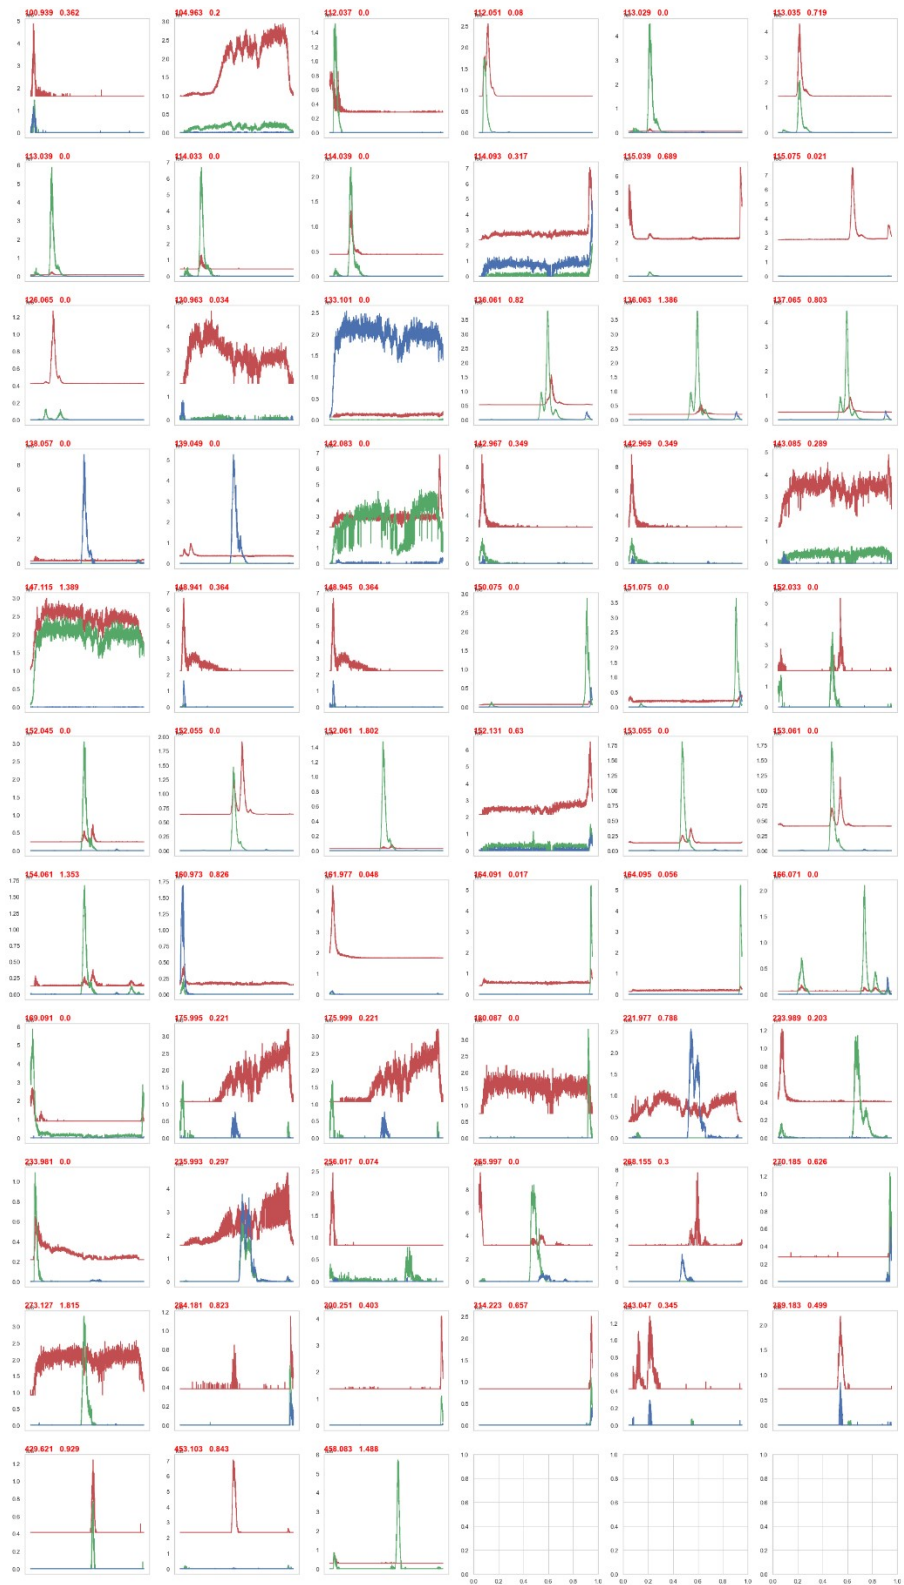

**Figure S9.** Determination of nucleosides and modified nucleosides in total RNAs of MCF-7 cells based on different original and fragment ions with Python
